# Supplementary material for: An Insight into Nano Silver Fluoride-Coated Silk Fibroin Bioinspired Membrane Properties for Guided Tissue Regeneration
Source: MDPI journal article supplement (doi:10.3390/polym13162659), 2021-08-10
Supplement: s1 [file s1]

# **An Insight into Nano Silver Fluoride Coated Silk Fibroin Bioinspired Membrane Properties for Guided Tissue Regeneration**

Aditi Pandey<sup>1, §</sup>, Tzu-Sen Yang<sup>2, §</sup>, Belem Wendimi Fatimata<sup>5</sup>, Ta-I Yang<sup>3</sup>, Nai-Chia Teng<sup>4</sup>, I-  
Wen Chen<sup>4</sup>, Aivaras Kareiva<sup>6</sup>, Jen-Chang Yang<sup>1,5,7,8,\*</sup>

<sup>1</sup>*Graduate Institute of Nanomedicine and Medical Engineering, College of Biomedical Engineering, Taipei Medical University, Taipei 11052, Taiwan, ROC.*

<sup>2</sup>*Graduate Institute of Biomedical Optomechatronics, Taipei Medical University, Taipei 11031, Taiwan, ROC.*

<sup>3</sup>*Department of Chemical Engineering, Chung-Yuan Christian University, Taoyuan 32023, Taiwan*

<sup>4</sup>*School of Dentistry, College of Oral Medicine, Taipei Medical University, Taipei 11052, Taiwan, ROC.*

<sup>5</sup>*International Ph.D. Program in Biomedical Engineering, College of Biomedical Engineering, Taipei Medical University, Taipei 110-31, Taiwan, ROC.*

<sup>6</sup>*Institute of Chemistry, Vilnius University, Naugarduko 24, LT-03225 Vilnius, Lithuania*

<sup>7</sup>*Research Center of Biomedical Device, Taipei Medical University, Taipei, 110-52, Taiwan, ROC.*

<sup>8</sup>*Research Center of Digital Oral Science and Technology, Taipei Medical University, Taipei, 110-52, Taiwan, ROC.*

§ Aditi Pandey and Tzu-Sen Yang contributed equally to this work.

\* Correspondence: Dr. Jen-Chang Yang will be responsible for all correspondence and correction of the proofs:

Graduate Institute of Nanomedicine and Medical Engineering, College of Biomedical Engineering, Taipei Medical University, Taipei, Taiwan

250 Wu-Hsing Street, Taipei 110-52, Taiwan, ROC.

Tel: 886-2-2736-1661 ext. 5124; Fax: 886-2-27362295

E-mail: [yang820065@tmu.edu.tw](mailto:yang820065@tmu.edu.tw)

# Supplementary Data

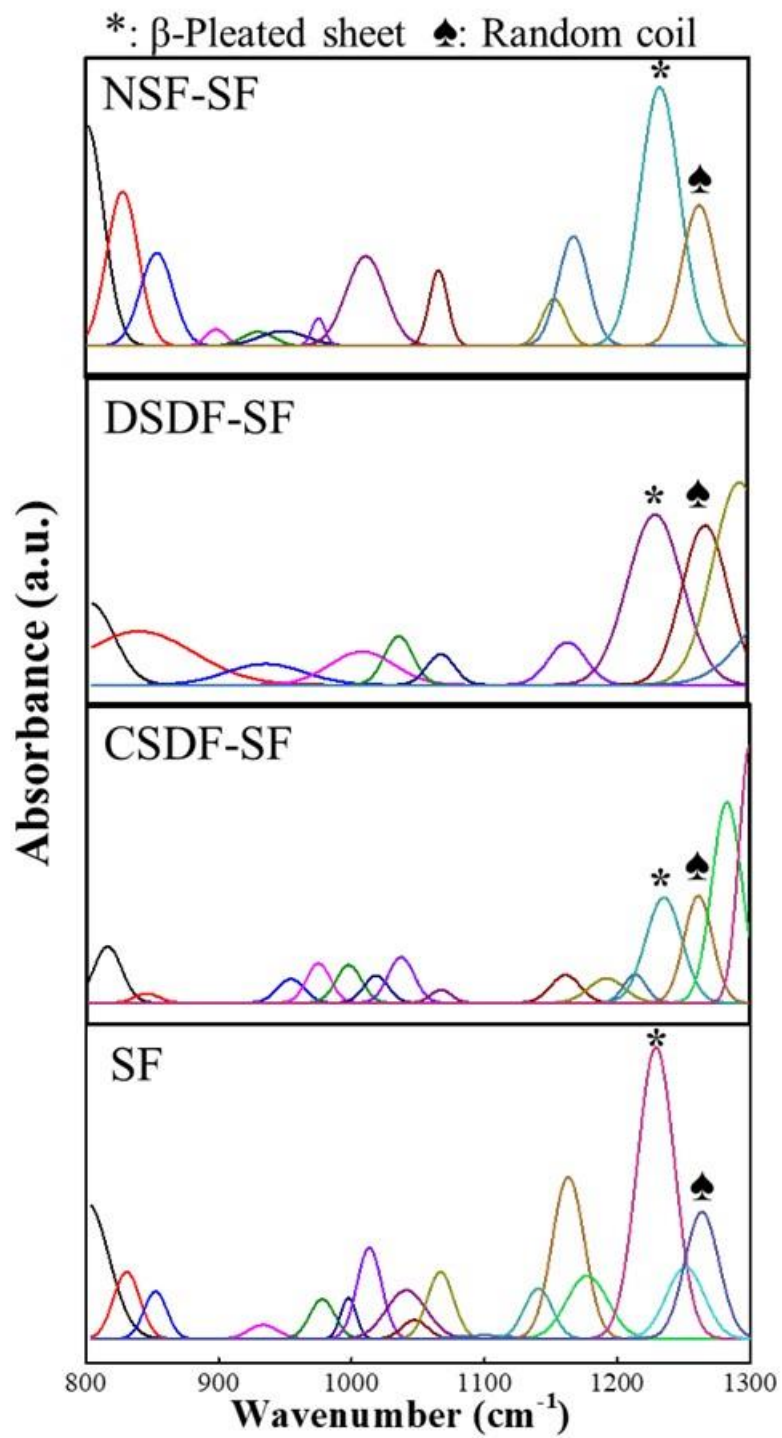

Figure S1: FTIR-ATR spectra of pure SF-based samples, without biomineralization.

Table S1: The  $\beta$ -sheet/random coil ratio of pure non-biomineralized samples

|           | $\frac{A_{1265}}{A_{1235} + A_{1256}}$ | FWHM<br>$A_{1235}$ | FWHM<br>$A_{1265}$ |
|-----------|----------------------------------------|--------------------|--------------------|
| SF-Pure   | 31                                     | 34.05              | 22.49              |
| NSF-Pure  | 33                                     | 35.15              | 29.72              |
| DSDF-Pure | 49                                     | 49.03              | 41.26              |
| CSDF-Pure | 56                                     | 34.44              | 29.46              |
